# Supplementary material for: A new non-centrosymmetric Gd-based borate crystal Rb7SrGd2(B5O10)3: growth, structure, and nonlinear optical and magnetic properties
Source: Royal Society of Chemistry journal article supplement (doi:10.1039/d0dt01793k), 2020-01-01
Supplement: d0dt01793k1.pdf [file d0dt01793k1.pdf]

## Supporting Information

### **A new non-centrosymmetric Gd-based borate crystal $\text{Rb}_7\text{SrGd}_2(\text{B}_5\text{O}_{10})_3$ : growth, structure, nonlinear optical and magnetic properties**

Wang Liu,<sup>ac</sup> Xiaomeng Liu,<sup>ac</sup> Jun Shen,<sup>a</sup> Yunfei Li,<sup>ac</sup> Huimin Song,<sup>ac</sup> Jingcheng Feng,<sup>ac</sup>  
Zheshuai Lin,<sup>a</sup> and Guochun Zhang<sup>\*abc</sup>

<sup>a</sup>. Key Laboratory of Functional Crystals and Laser Technology of Chinese Academy of Sciences, Key Laboratory of Cryogenics, Technical Institute of Physics and Chemistry, Chinese Academy of Sciences, Beijing 100190, China.

*E-mail: gc Zhang@mail.ipc.ac.cn*

<sup>b</sup>. State Key Laboratory of Crystal Materials, Shandong University, Jinan, 250100, China

<sup>c</sup>. Center of Materials Science and Optoelectronics Engineering, University of Chinese Academy of Sciences, Beijing 100049, China

Table S1. Atomic coordinates ( $\times 10^4$ ), equivalent isotropic displacement parameters ( $\text{\AA}^2 \times 10^3$ ), and bond valence sums (BVS) for  $\text{Rb}_7\text{SrGd}_2(\text{B}_5\text{O}_{10})_3$ .

$U_{\text{eq}}$  is defined as 1/3 of of the trace of the orthogonalised  $U_{ij}$  tensor.

| Atom | $x$      | $y$       | $z$     | $U(\text{eq})$ | BVS  |
|------|----------|-----------|---------|----------------|------|
| Rb1  | 6667     | 3333      | 3333    | 22.1(5)        | 1.17 |
| Rb2  | 4801(11) | 0         | 0       | 27.9(4)        | 0.97 |
| Rb3  | 3333     | 1274(12)  | 1667    | 21.8(3)        | 1.12 |
| Sr1  | 6667     | 3333      | -1667   | 7.6(4)         | 2.15 |
| Gd1  | 6667     | 3333      | 628(5)  | 13.0(2)        | 2.87 |
| B1   | 959(10)  | -1352(10) | 1305(7) | 18(3)          | 3.03 |
| B2   | 6667     | 758(12)   | 3333    | 17(3)          | 3.06 |
| B3   | 7765(11) | 1913(11)  | -534(7) | 17(3)          | 3.09 |
| O1   | 7554(7)  | 2768(7)   | -478(4) | 21.5(17)       |      |
| O2   | 1014(7)  | -634(7)   | 1931(4) | 23.5(18)       |      |
| O3   | 4785(8)  | -77(7)    | 2134(5) | 36(3)          |      |
| O4   | 7690(7)  | 637(7)    | 3280(5) | 22.7(16)       |      |
| O5   | 6631(6)  | 1382(6)   | 2558(5) | 19.6(15)       |      |

Table S2. Selected bond lengths for Rb<sub>7</sub>SrGd<sub>2</sub>(B<sub>5</sub>O<sub>10</sub>)<sub>3</sub>.

| Atoms                | Length/Å  | Atoms                | Length/Å  |
|----------------------|-----------|----------------------|-----------|
| Rb1–O5 <sup>1</sup>  | 2.867(8)  | Rb3–O5 <sup>17</sup> | 2.849(8)  |
| Rb1–O5 <sup>6</sup>  | 2.867(8)  | Rb3–O4 <sup>2</sup>  | 3.011(8)  |
| Rb1–O5 <sup>7</sup>  | 2.867(8)  | Rb3–O4 <sup>17</sup> | 3.011(8)  |
| Rb1–O5 <sup>8</sup>  | 2.867(8)  | Sr1–O1               | 2.500(7)  |
| Rb1–O5               | 2.867(8)  | Gd1–O1               | 2.409(7)  |
| Rb1–O5 <sup>2</sup>  | 2.867(8)  | Gd1–O1 <sup>1</sup>  | 2.409(7)  |
| Rb2–O3 <sup>14</sup> | 3.270(8)  | Gd1–O1 <sup>2</sup>  | 2.409(7)  |
| Rb2–O3               | 3.270(8)  | Gd1–O2 <sup>3</sup>  | 2.276(7)  |
| Rb2–O4 <sup>15</sup> | 2.942(8)  | Gd1–O2 <sup>4</sup>  | 2.276(7)  |
| Rb2–O4 <sup>16</sup> | 2.942(8)  | Gd1–O2 <sup>5</sup>  | 2.276(7)  |
| Rb2–O1 <sup>12</sup> | 3.147(8)  | B1–O2                | 1.340(13) |
| Rb2–O1 <sup>2</sup>  | 3.147(8)  | B1 <sup>3</sup> –O3  | 1.389(14) |
| Rb2–O2 <sup>13</sup> | 2.915(7)  | B1 <sup>3</sup> –O5  | 1.357(13) |
| Rb2–O2 <sup>3</sup>  | 2.915(7)  | B2–O5                | 1.471(12) |
| Rb3–O2               | 2.921(8)  | B2–O4                | 1.472(12) |
| Rb3–O2 <sup>3</sup>  | 2.921(8)  | B3–O1                | 1.322(13) |
| Rb3–O3               | 3.354(10) | B3 <sup>15</sup> –O4 | 1.377(14) |
| Rb3–O3 <sup>3</sup>  | 3.354(10) | B3 <sup>18</sup> –O3 | 1.411(12) |
| Rb3–O5 <sup>2</sup>  | 2.849(8)  |                      |           |

<sup>1</sup>1-Y,+X-Y,+Z; <sup>2</sup>1+Y-X,1-X,+Z; <sup>3</sup>2/3-X,1/3-X+Y,1/3-Z; <sup>4</sup>2/3-Y+X,1/3-Y,1/3-Z;

<sup>5</sup>2/3+Y,1/3+X,1/3-Z; <sup>6</sup>1/3-Y+X,2/3-Y,2/3-Z; <sup>7</sup>1/3+Y,-1/3+X,2/3-Z; <sup>8</sup>4/3-X,2/3-X+Y,2/3-Z;

<sup>9</sup>2/3-Y,1/3+X-Y,1/3+Z; <sup>10</sup>2/3+X,1/3+Y,1/3+Z; <sup>11</sup>2/3+Y-X,1/3-X,1/3+Z; <sup>12</sup>+Y,-1+X,-Z;

<sup>13</sup>1/3-Y,-1/3+X-Y,-1/3+Z; <sup>14</sup>-Y+X,-Y,-Z; <sup>15</sup>4/3+Y-X,2/3-X,-1/3+Z; <sup>16</sup>2/3+Y,-2/3+X,1/3-Z;

<sup>17</sup>-1/3-Y+X,1/3-Y,1/3-Z; <sup>18</sup>2/3-Y,-2/3+X-Y,1/3+Z

Table S3 Selected bond angles for Rb<sub>7</sub>SrGd<sub>2</sub>(B<sub>5</sub>O<sub>10</sub>)<sub>3</sub>.

| Atoms                                | Angle/°  | Atoms                                 | Angle/°   |
|--------------------------------------|----------|---------------------------------------|-----------|
| O1-Gd1-O1 <sup>1</sup>               | 76.0(2)  | O2 <sup>3</sup> -Gd1-O2 <sup>4</sup>  | 95.3(2)   |
| O1-Gd1-O1 <sup>2</sup>               | 76.0(2)  | O2-B1-O3 <sup>5</sup>                 | 118.5(10) |
| O1 <sup>2</sup> -Gd1-O1 <sup>1</sup> | 76.0(2)  | O2-B1-O5 <sup>5</sup>                 | 122.4(10) |
| O2 <sup>4</sup> -Gd1-O1 <sup>1</sup> | 86.5(2)  | O5 <sup>5</sup> -B1-O3 <sup>5</sup>   | 119.0(9)  |
| O2 <sup>4</sup> -Gd1-O1              | 162.3(3) | O5-B2-O5 <sup>6</sup>                 | 107.8(12) |
| O2 <sup>3</sup> -Gd1-O1              | 86.5(2)  | O5 <sup>6</sup> -B2-O4                | 111.3(4)  |
| O2 <sup>4</sup> -Gd1-O1 <sup>2</sup> | 102.0(3) | O5-B2-O4 <sup>6</sup>                 | 111.3(4)  |
| O2 <sup>5</sup> -Gd1-O1 <sup>1</sup> | 162.3(3) | O5-B2-O4                              | 108.7(4)  |
| O2 <sup>3</sup> -Gd1-O1 <sup>1</sup> | 102.0(3) | O5 <sup>6</sup> -B2-O4 <sup>6</sup>   | 108.7(4)  |
| O2 <sup>3</sup> -Gd1-O1 <sup>2</sup> | 162.3(3) | O4-B2-O4 <sup>6</sup>                 | 109.1(12) |
| O2 <sup>5</sup> -Gd1-O1              | 102.0(3) | O1-B3-O3 <sup>14</sup>                | 121.1(10) |
| O2 <sup>5</sup> -Gd1-O1 <sup>2</sup> | 86.5(3)  | O1-B3-O4 <sup>16</sup>                | 121.2(9)  |
| O2 <sup>5</sup> -Gd1-O2 <sup>4</sup> | 95.3(2)  | O4 <sup>16</sup> -B3-O3 <sup>14</sup> | 117.6(9)  |
| O2 <sup>3</sup> -Gd1-O2 <sup>5</sup> | 95.3(2)  |                                       |           |

<sup>1</sup>1-Y, +X-Y, +Z; <sup>2</sup>1+Y-X, 1-X, +Z; <sup>3</sup>2/3-X, 1/3-X+Y, 1/3-Z; <sup>4</sup>2/3-Y+X, 1/3-Y, 1/3-Z; <sup>5</sup>2/3+Y, 1/3+X, 1/3-Z;  
<sup>6</sup>1/3-Y+X, 2/3-Y, 2/3-Z; <sup>7</sup>4/3-X, 2/3-X+Y, 2/3-Z; <sup>8</sup>1/3+Y, -1/3+X, 2/3-Z; <sup>9</sup>2/3+X, 1/3+Y, 1/3+Z;  
<sup>10</sup>2/3-Y, 1/3+X-Y, 1/3+Z; <sup>11</sup>2/3+Y-X, 1/3-X, 1/3+Z; <sup>12</sup>+Y, -1+X, -Z; <sup>13</sup>1/3-Y, -1/3+X-Y, -1/3+Z;  
<sup>14</sup>-Y+X, -Y, -Z; <sup>15</sup>2/3+Y, -2/3+X, 1/3-Z; <sup>16</sup>4/3+Y-X, 2/3-X, -1/3+Z; <sup>17</sup>-1/3-Y+X, 1/3-Y, 1/3-Z;  
<sup>18</sup>1+Y, +X, -Z; <sup>19</sup>2/3-Y, -2/3+X-Y, 1/3+Z; <sup>20</sup>1/3+Y-X, 2/3-X, -1/3+Z; <sup>21</sup>4/3-X, 2/3-X+Y, -1/3-Z;  
<sup>22</sup>1/3+Y, -1/3+X, -1/3-Z; <sup>23</sup>1/3-Y+X, 2/3-Y, -1/3-Z

Table S4 Anisotropic displacement parameters ( $\text{\AA}^2 \times 10^3$ ) for  $\text{Rb}_7\text{SrGd}_2(\text{B}_5\text{O}_{10})_3$ .

The anisotropic displacement factor exponent takes the form:  $-2\pi^2[h^2a^*2U_{11}+2hka^*b^*U_{12}+\dots]$ .

| Atom | $U_{11}$ | $U_{22}$ | $U_{33}$ | $U_{12}$ | $U_{13}$ | $U_{23}$ |
|------|----------|----------|----------|----------|----------|----------|
| Gd1  | 12.9(3)  | 12.9(3)  | 13.1(3)  | 0        | 0        | 6.43(14) |
| Rb1  | 14.0(6)  | 14.0(6)  | 38.4(12) | 0        | 0        | 7.0(3)   |
| Rb2  | 23.0(7)  | 25.2(8)  | 36.1(8)  | -15.5(6) | -7.8(3)  | 12.6(4)  |
| Rb3  | 14.0(7)  | 26.0(6)  | 21.6(7)  | -0.8(2)  | -1.6(5)  | 7.0(3)   |
| O1   | 25(4)    | 24(4)    | 24(3)    | 0(3)     | 0(3)     | 19(4)    |
| O2   | 31(5)    | 24(5)    | 21(3)    | -7(3)    | -2(3)    | 18(4)    |
| O3   | 32(6)    | 21(4)    | 34(4)    | 9(3)     | -23(4)   | -2(4)    |
| O5   | 19(4)    | 15(4)    | 23(4)    | 3(3)     | -2(3)    | 6(3)     |
| O4   | 26(4)    | 29(4)    | 24(4)    | -13(3)   | -8(3)    | 22(4)    |
| B3   | 22(7)    | 26(7)    | 18(5)    | -5(5)    | 0(5)     | 22(6)    |
| B2   | 13(8)    | 17(6)    | 20(7)    | -2(3)    | -4(5)    | 7(4)     |
| B1   | 21(7)    | 19(6)    | 19(5)    | -2(4)    | -2(4)    | 15(6)    |
| Sr1  | 10.6(6)  | 10.6(6)  | 1.6(7)   | 0        | 0        | 5.3(3)   |

Table S5. Assignments of the infrared absorption peaks for  $\text{Rb}_7\text{SrGd}_2(\text{B}_5\text{O}_{10})_3$ .

| Mode description                                                    | $\text{Rb}_7\text{SrGd}_2(\text{B}_5\text{O}_{10})_3$ ( $\text{cm}^{-1}$ ) |
|---------------------------------------------------------------------|----------------------------------------------------------------------------|
| asymmetric stretching of $[\text{BO}_3]^{3-}$                       | 1363, 1250, 1190                                                           |
| asymmetric stretching vibrations $[\text{BO}_4]^{5-}$               | 1034, 933                                                                  |
| symmetric stretching of $[\text{B}_5\text{O}_{10}]^{5-}$            | 777, 734                                                                   |
| bending vibrations of $[\text{BO}_3]^{3-}$ and $[\text{BO}_4]^{5-}$ | 487–611                                                                    |
